# Supplementary material for: Experimental and DFT mechanistic insights into one-pot synthesis of 1H-pyrazolo[1,2-b]phthalazine-5,10-diones under catalysis of DBU-based ionic liquids
Source: Royal Society of Chemistry journal article supplement (doi:10.1039/d0nj03478a), 2020-01-01
Supplement: d0nj03478a1.pdf [file d0nj03478a1.pdf]

## Supplementary Information

### Experimental and DFT mechanistic insights on one-pot synthesis of 1*H*-pyrazolo[1,2-*b*]phthalazine-5,10-diones under catalysis of DBU-based ionic liquids

Sara Fallah-Ghasemi Gildeh, Morteza Mehrdad,\* Hossein Roohi, Khaterreh Ghauri, Sahar Fallah-Ghasemi Gildeh, and Kurosh Rad-Moghadam\*

E-mail addresses: radmm@guilan.ac.ir (K. Rad-Moghadam); mehrdad@guilan.ac.ir (M. Mehrdad).

#### List of Contents

|                                                                                                                                                               |    |
|---------------------------------------------------------------------------------------------------------------------------------------------------------------|----|
| 1. The optimized structures of [Bn-DBU][OAc] and [Bn-DBU][TFA] at B3LYP/SVP level of theory in gas phase .....                                                | S1 |
| 2. The FT-IR spectra of the two synthesized DBU-based ILs, [Bn-DBU][CH <sub>3</sub> CO <sub>2</sub> ] and [Bn-DBU][CF <sub>3</sub> CO <sub>2</sub> ].....     | S2 |
| 3. The H NMR spectra of the two synthesized DBU-based ILs, (1) [Bn-DBU][CH <sub>3</sub> CO <sub>2</sub> ] and [Bn-DBU][CF <sub>3</sub> CO <sub>2</sub> ]..... | S3 |
| 4. The EDX spectra of fresh [Bn-DBU][TFA] (up) and [Bn-DBU][TFA] after 4 <sup>th</sup> recycling (below).....                                                 | S4 |
| 5. H NMR spectra of the some synthesized 1 <i>H</i> -pyrazolo[1,2- <i>b</i> ]phthalazine-5,10-diones.....                                                     | S5 |
| 6. The optimized structures of the compounds (1), (2f), (3) and (4f) using DFT at B3LYP/SVP level of theory in gas phase for synthesis of 4f .....            | S6 |
| 7. The optimized structures of the mechanistic proposal for the synthesis of 4f at B3LYP/SVP level theory in gas phase.....                                   | S7 |
| 8. The optimized structures for synthesis of 4f with mechanism proposed at B3LYP/SVP level of theory in gas phase.....                                        | S8 |

9. The approach of 5 to phthalhydrazide in its complexes with [Bn-DBU][AcO] and [Bn-DBU][TFA] ILs at B3LYP/SVP level of theory in gas phase.....S9

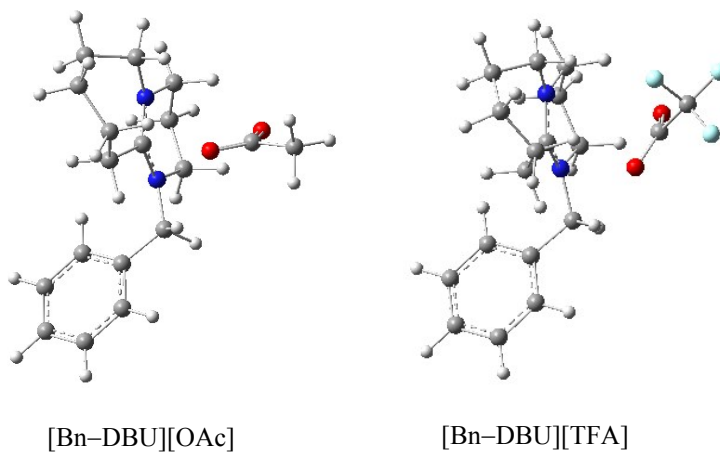

**Fig. S1** The optimized structures of [Bn-DBU][OAc] and [Bn-DBU][TFA] at B3LYP/SVP level of theory in gas phase.

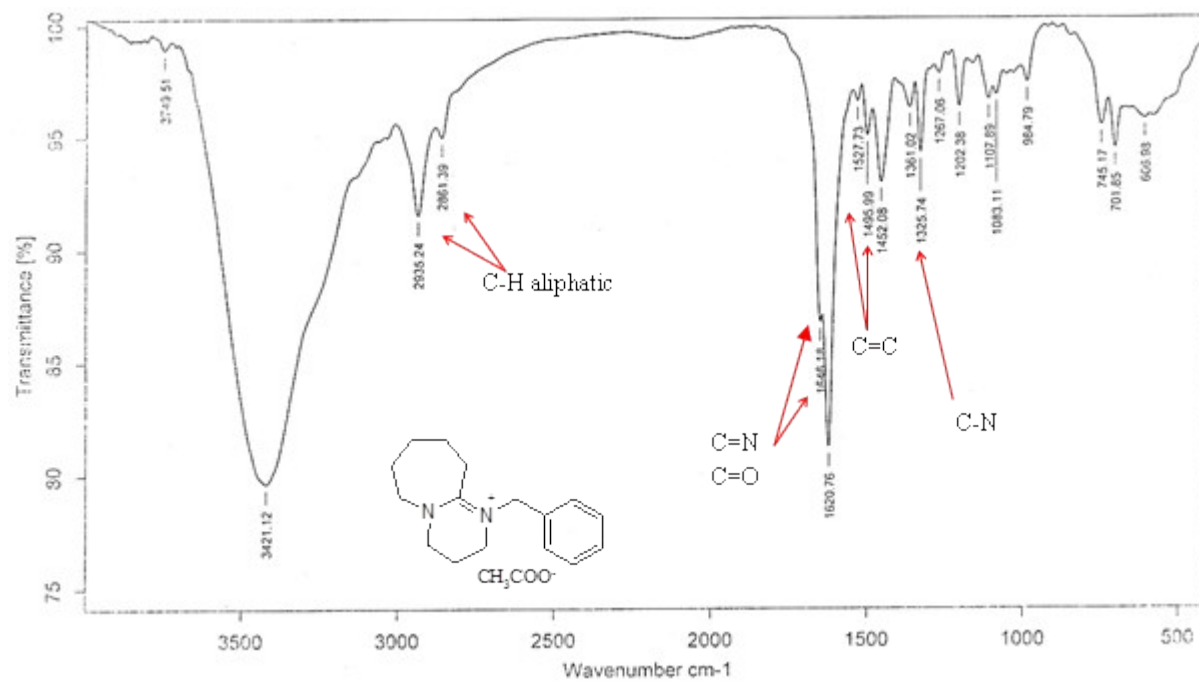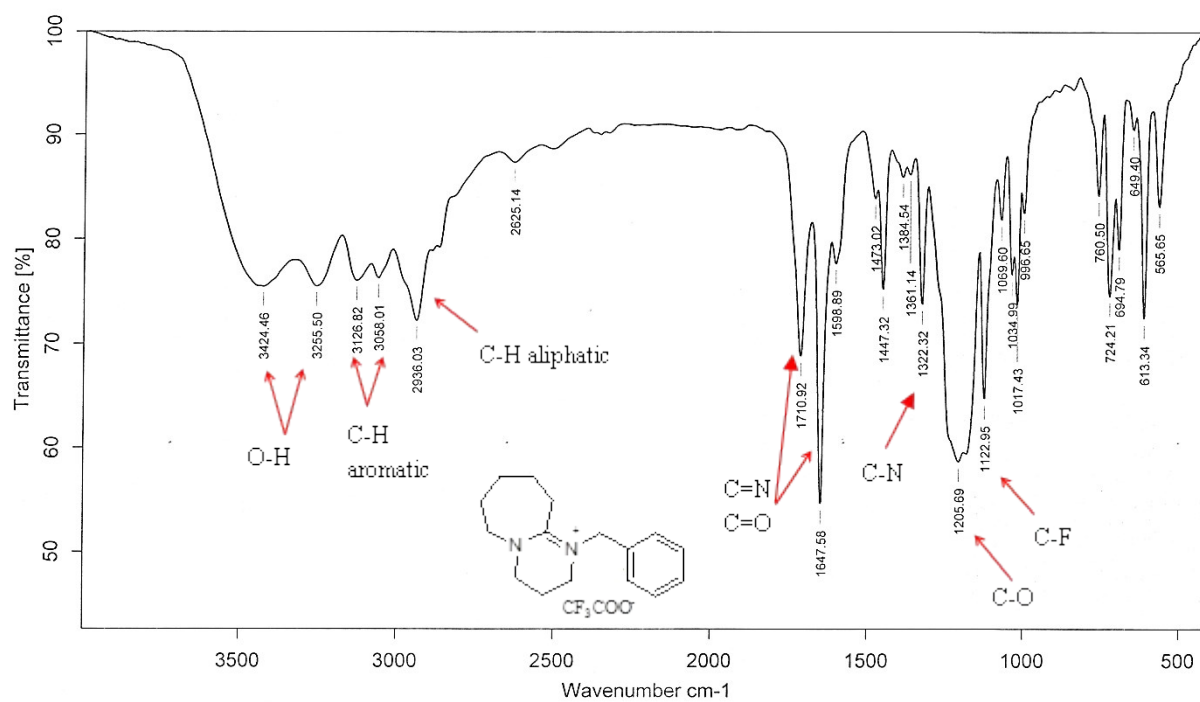

**Fig. S2** The FT-IR spectra of the two synthesized DBU-based ILs, [Bn-DBU][CH<sub>3</sub>CO<sub>2</sub>] (up) [Bn-DBU][CF<sub>3</sub>CO<sub>2</sub>] (below).

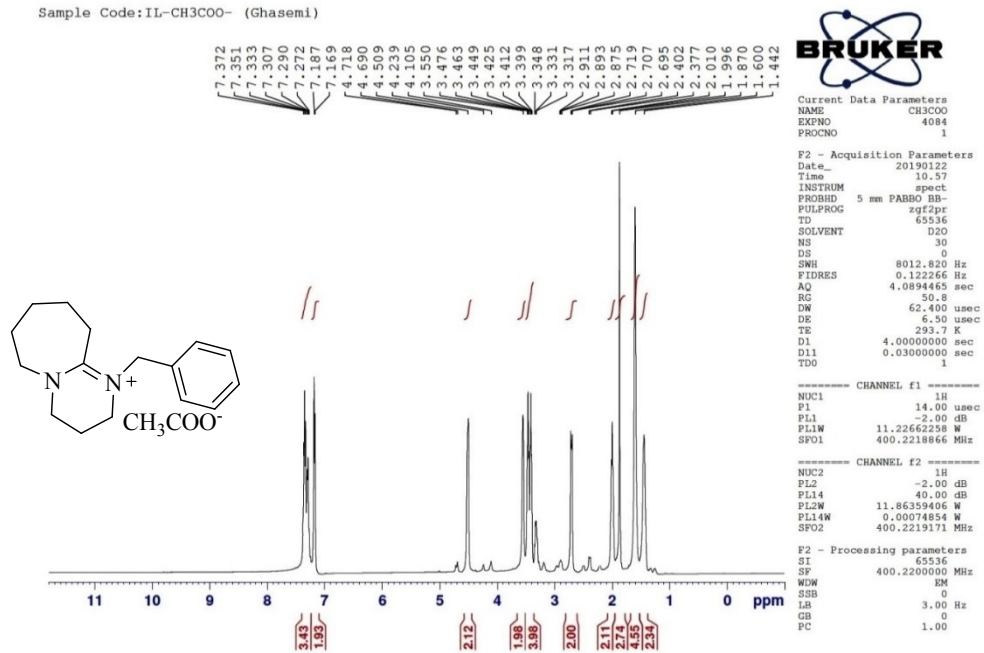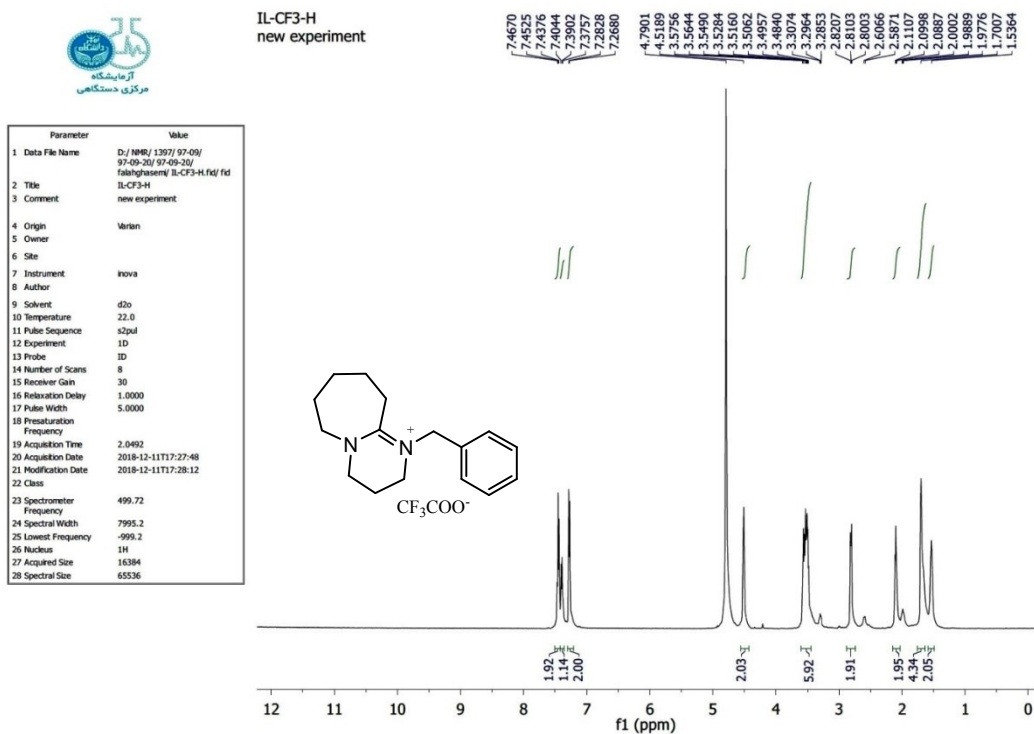

**Fig. S3** The <sup>1</sup>H NMR spectra of the two synthesized DBU-based ILs, (up) [Bn-DBU][CH<sub>3</sub>CO<sub>2</sub>], (below) [Bn-DBU][CF<sub>3</sub>CO<sub>2</sub>]

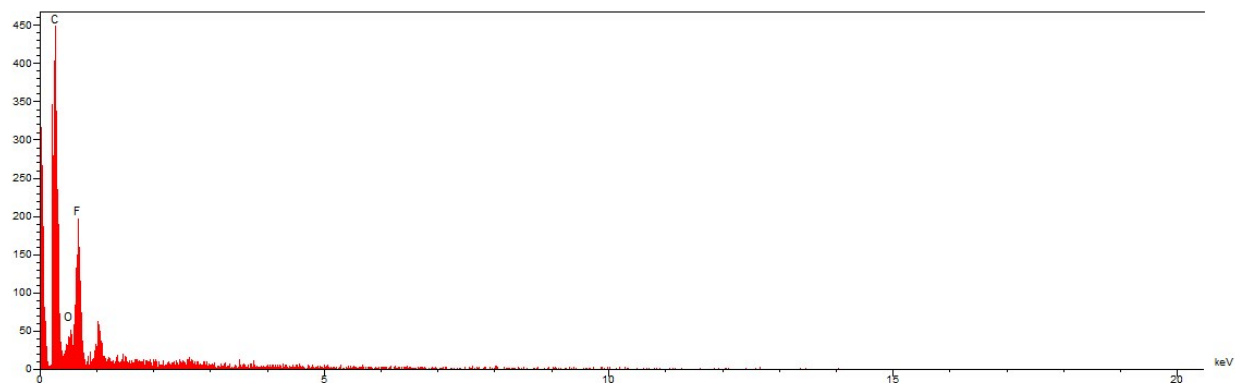

| Elt | Line | Int   | Error   | K      | Kr     | W%     | A%     | ZAF    | Formula | Ox%  | Pk/Bg  | Class | LConf | HConf | Cat# |
|-----|------|-------|---------|--------|--------|--------|--------|--------|---------|------|--------|-------|-------|-------|------|
| C   | Ka   | 212.8 | 37.4548 | 0.8124 | 0.3900 | 64.16  | 72.74  | 0.6077 |         | 0.00 | 127.02 | A     | 61.74 | 66.58 | 0.00 |
| O   | Ka   | 26.2  | 37.4548 | 0.0498 | 0.0239 | 11.73  | 9.98   | 0.2039 |         | 0.00 | 21.70  | A     | 10.47 | 12.99 | 0.00 |
| F   | Ka   | 104.0 | 37.4548 | 0.1378 | 0.0661 | 24.11  | 17.28  | 0.2743 |         | 0.00 | 47.11  | A     | 22.81 | 25.41 | 0.00 |
|     |      |       |         | 1.0000 | 0.4800 | 100.00 | 100.00 |        |         | 0.00 |        |       |       |       | 0.00 |

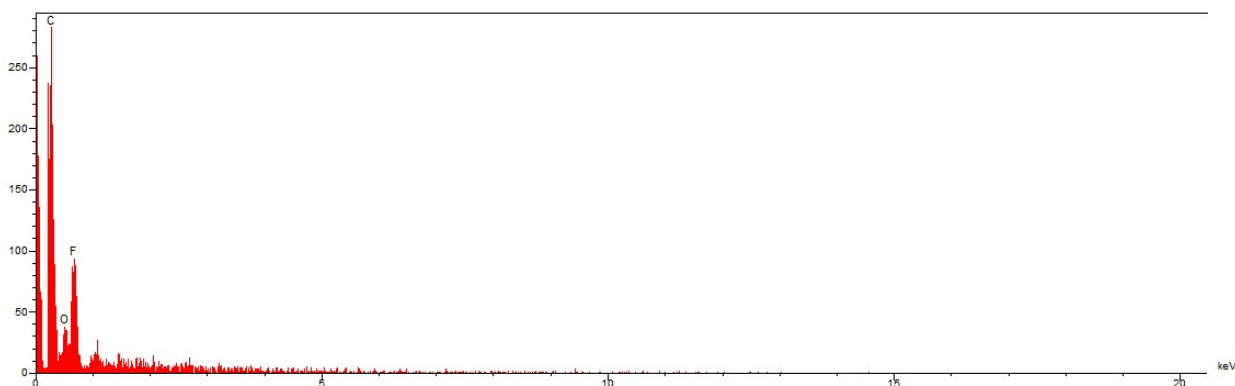

| Elt | Line | Int   | Error   | K      | Kr     | W%     | A%     | ZAF    | Formula | Ox%  | Pk/Bg  | Class | LConf | HConf | Cat# |
|-----|------|-------|---------|--------|--------|--------|--------|--------|---------|------|--------|-------|-------|-------|------|
| C   | Ka   | 188.9 | 16.0765 | 0.8502 | 0.4328 | 67.56  | 75.46  | 0.6404 |         | 0.00 | 466.40 | A     | 64.58 | 70.55 | 0.00 |
| O   | Ka   | 21.1  | 16.0765 | 0.0472 | 0.0240 | 12.41  | 10.40  | 0.1937 |         | 0.00 | 16.81  | A     | 10.76 | 14.05 | 0.00 |
| F   | Ka   | 65.7  | 16.0765 | 0.1026 | 0.0522 | 20.03  | 14.14  | 0.2608 |         | 0.00 | 30.55  | A     | 18.52 | 21.53 | 0.00 |
|     |      |       |         | 1.0000 | 0.5091 | 100.00 | 100.00 |        |         | 0.00 |        |       |       |       | 0.00 |

**Fig. S4** The EDX spectra of fresh [Bn-DBU][TFA] (up) and [Bn-DBU][TFA] after 4<sup>th</sup> recycling (below)

218-H

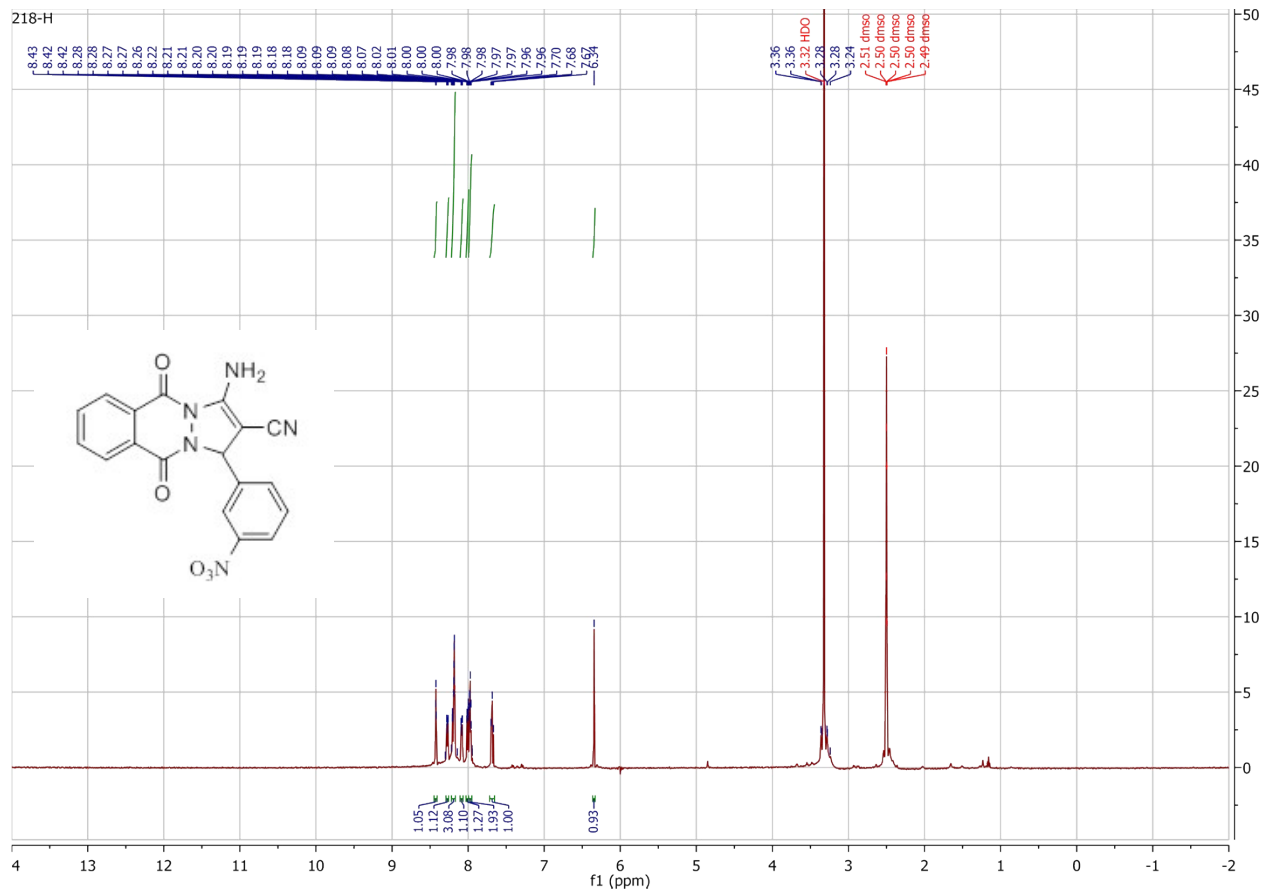

122-H

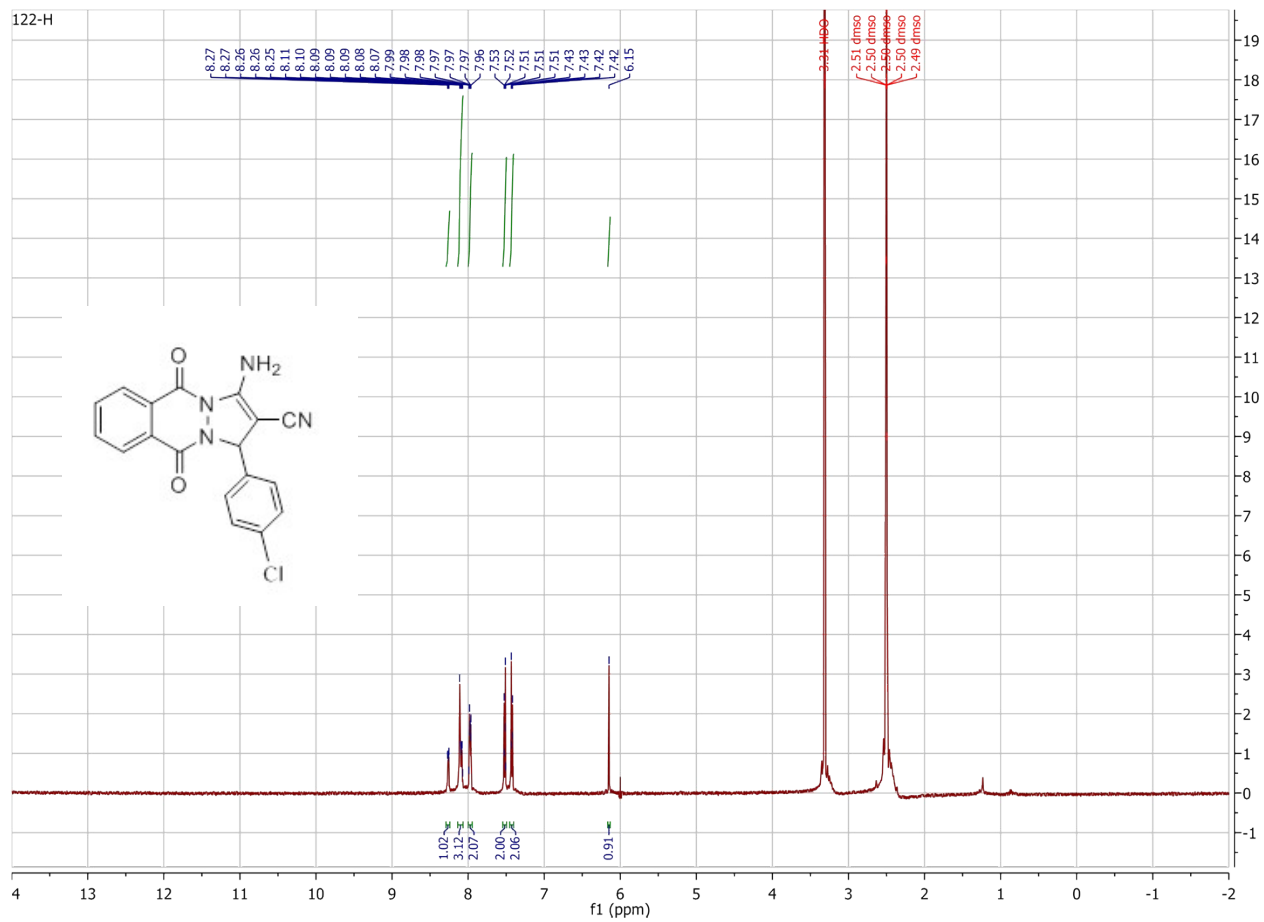

f1 (ppm)

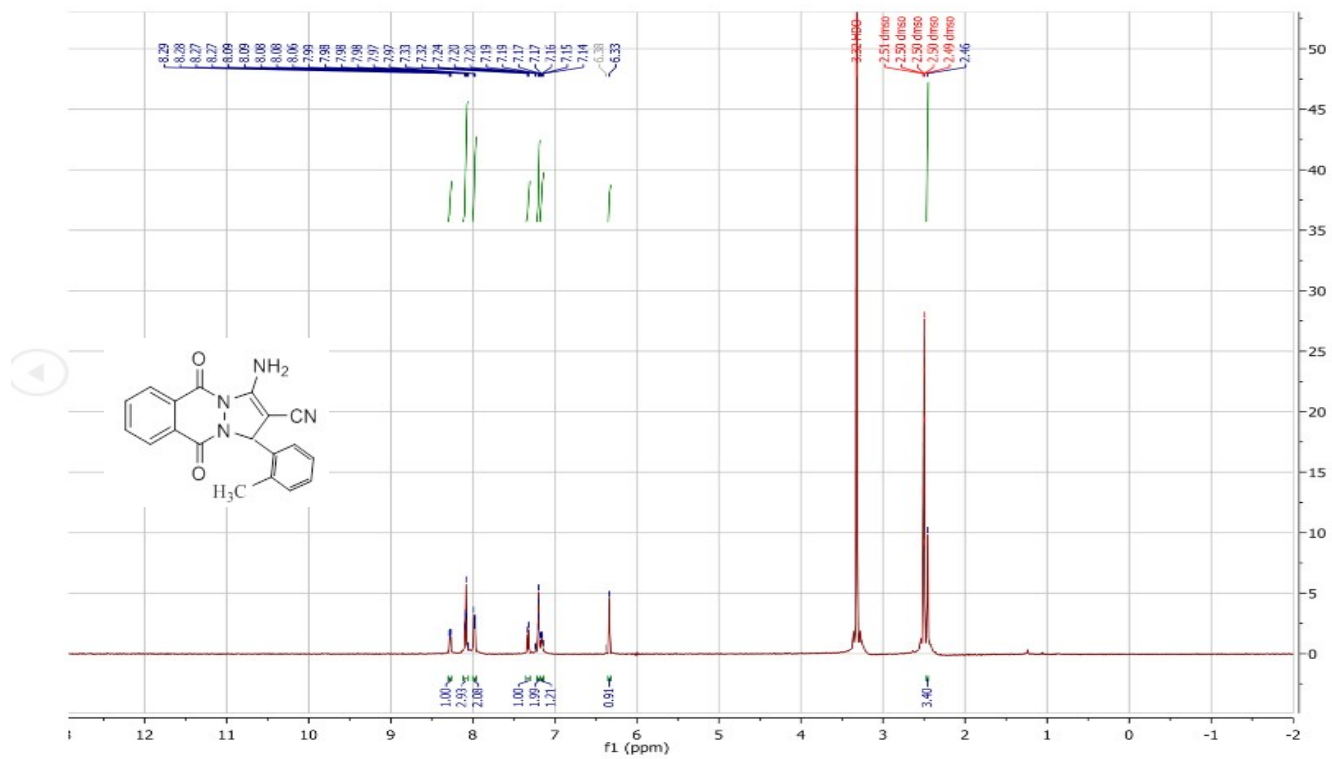



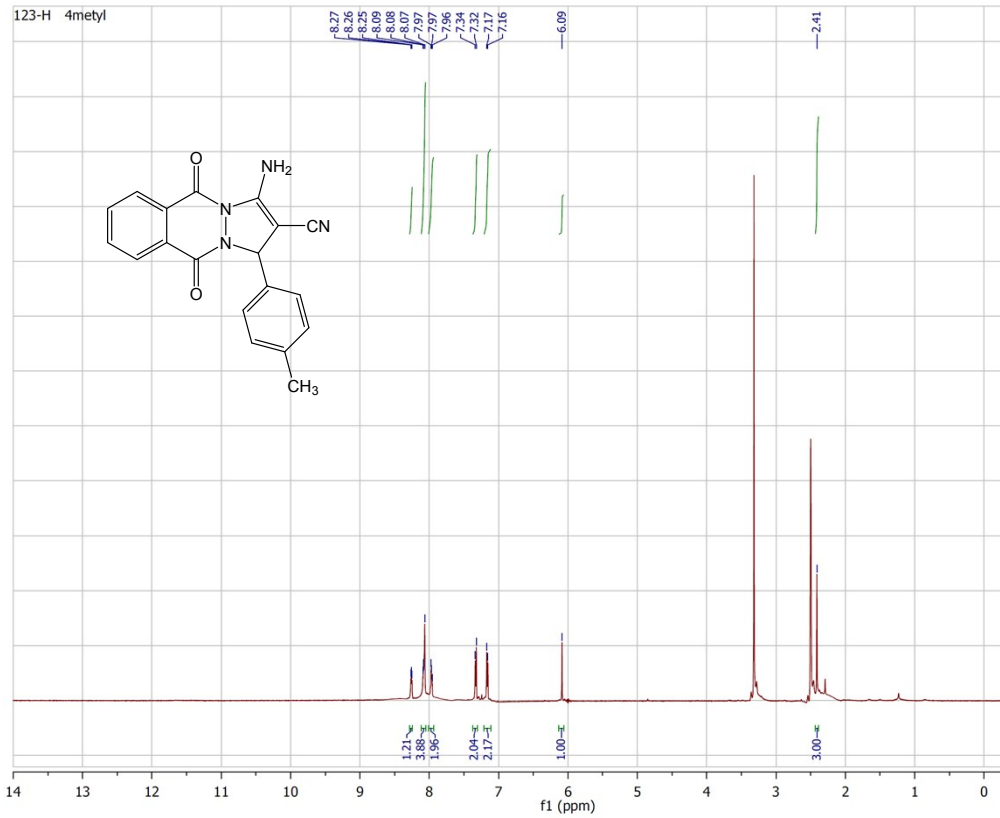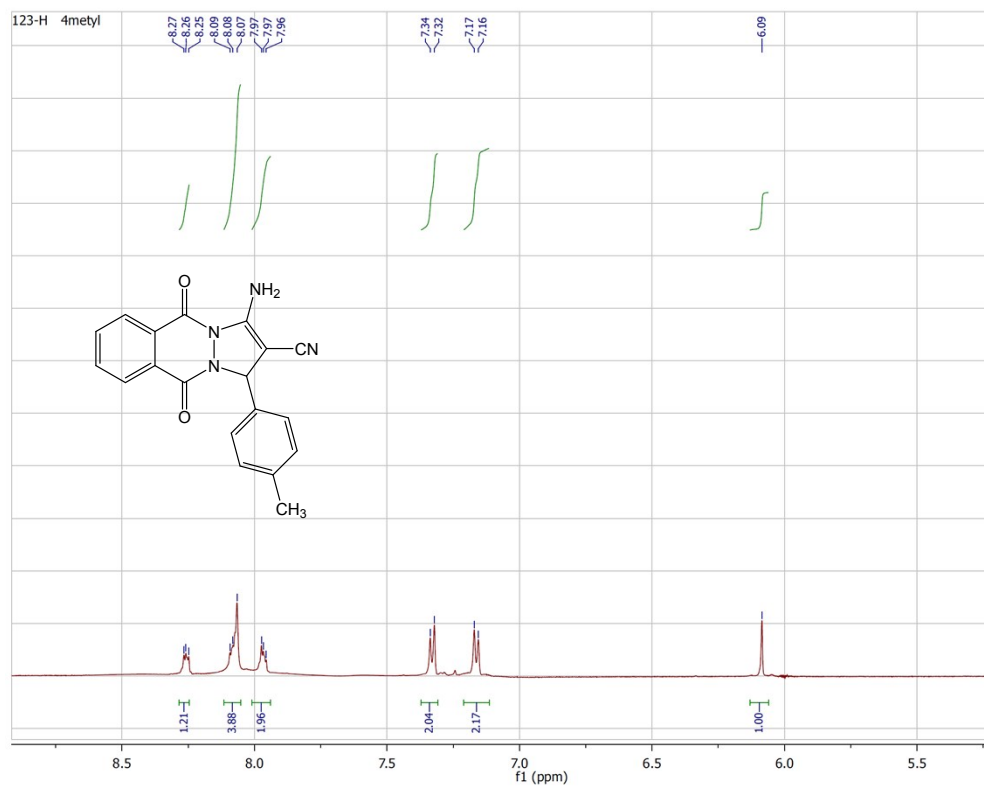

f1 (ppm)

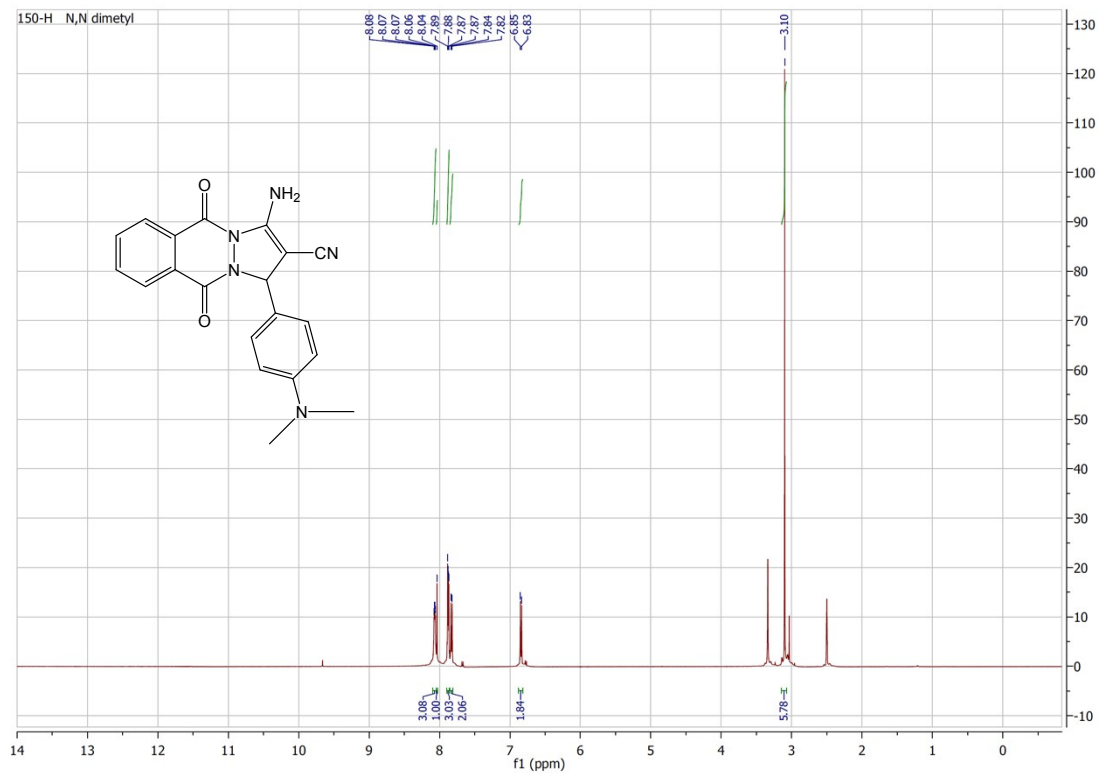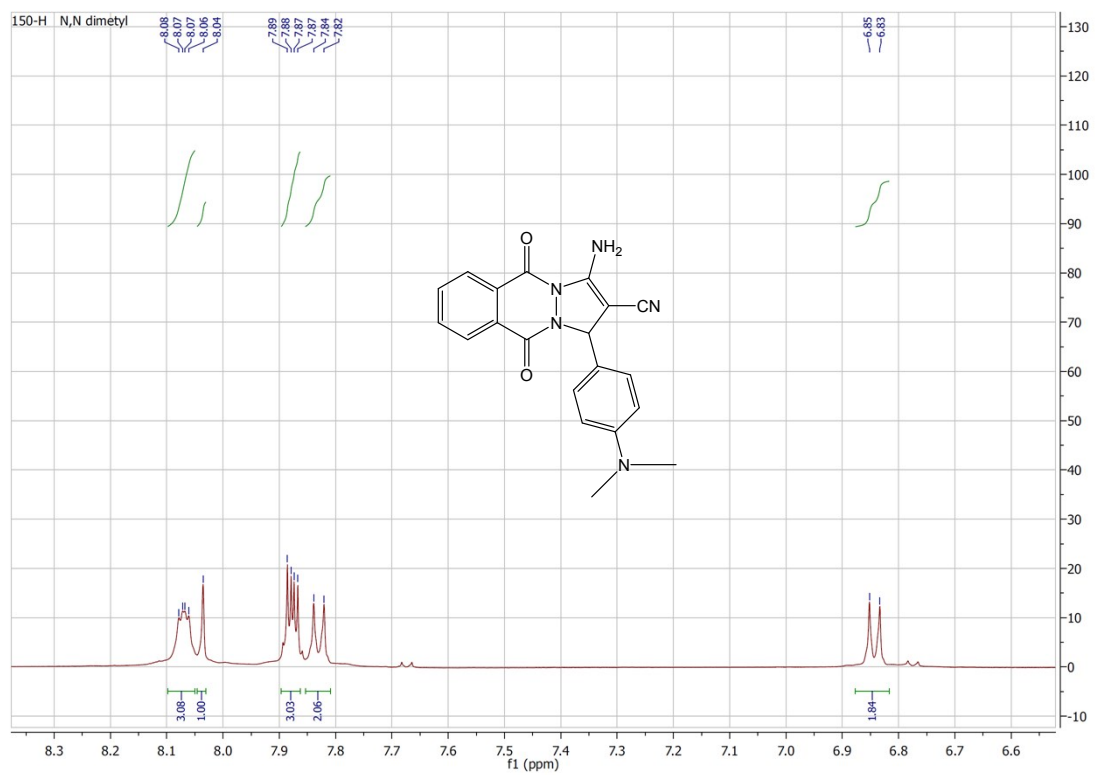

Fig. S5  $^1\text{H}$  NMR spectra of the synthesized 1H-pyrazolo[1,2-*b*]phthalazine-5,10-diones

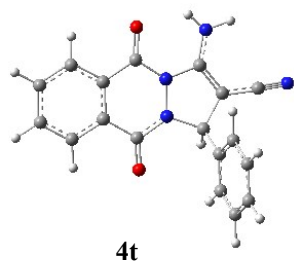

**Fig. S6** The optimized structures of **4t** using DFT at B3LYP/SVP level of theory in gas phase

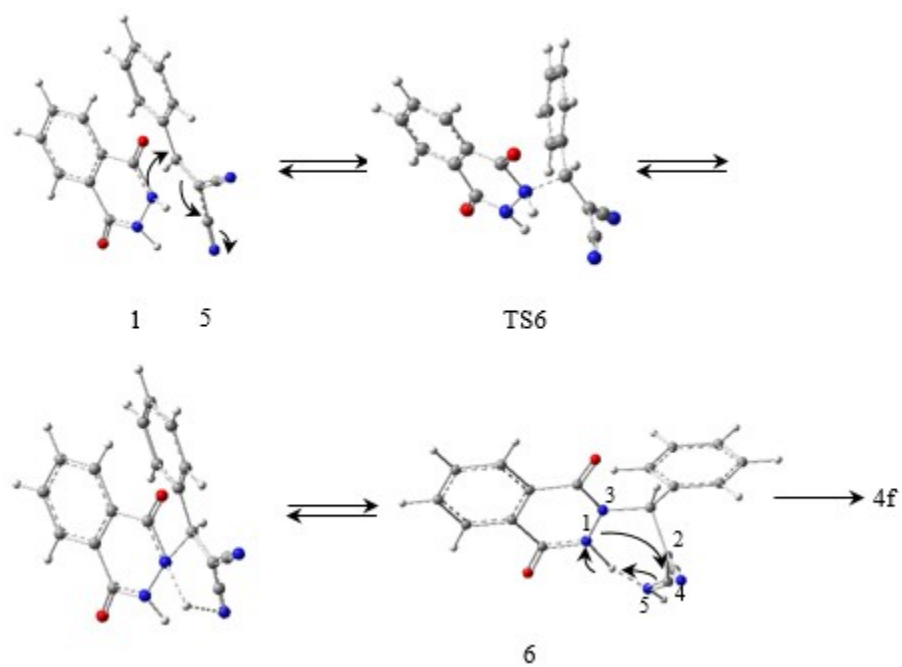

**Fig. S7** The optimized structures of mechanistic proposal for the synthesis of **4t** at B3LYP/SVP level theory in gas phase.

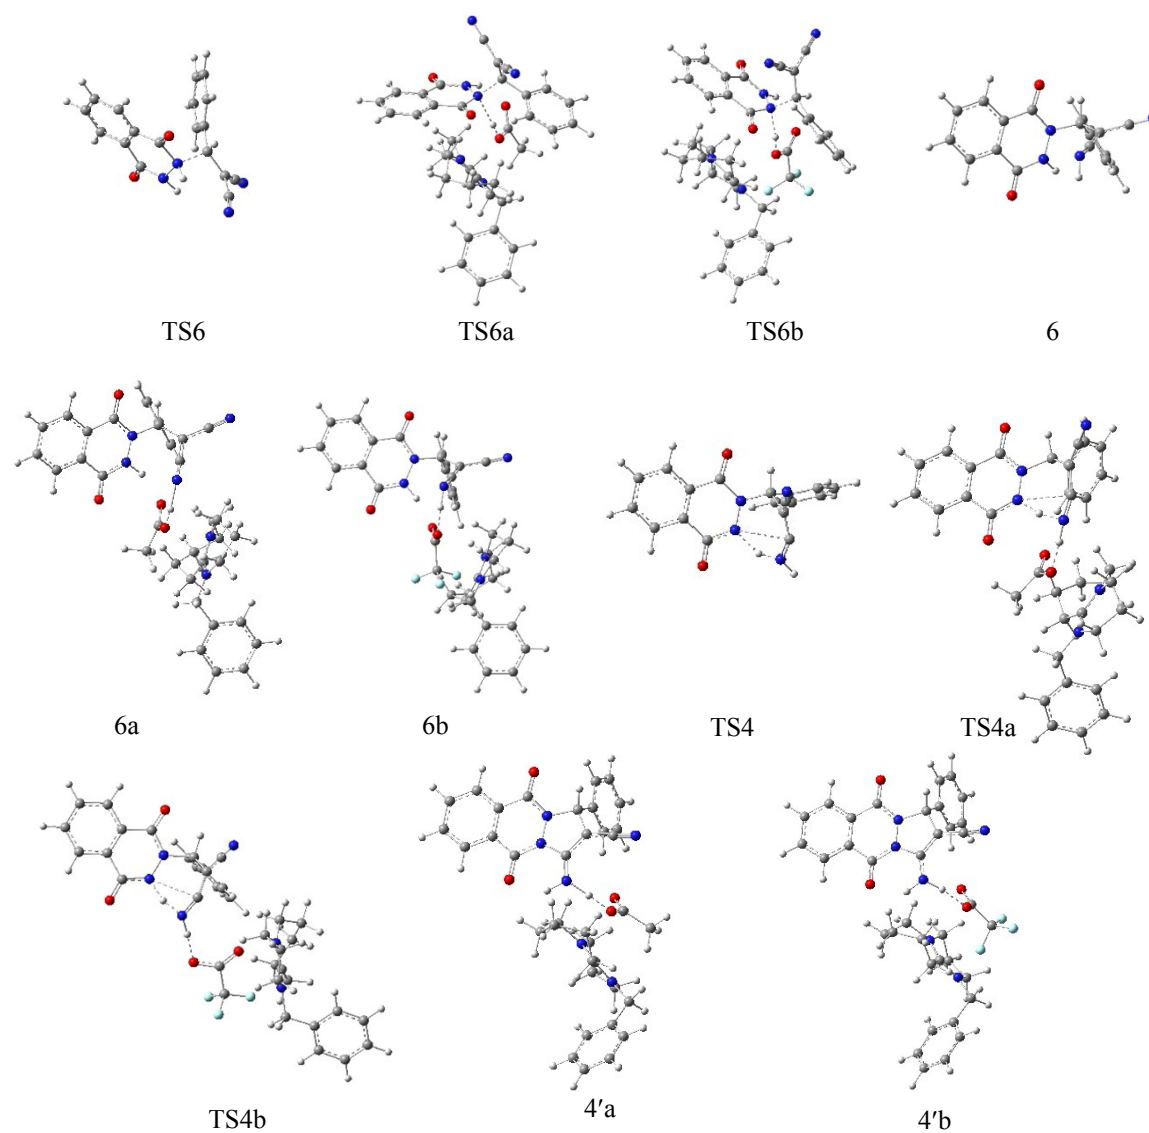

**Fig. S8** The optimized structures for synthesis of **4t** with mechanism proposed at B3LYP/SVP level of theory in gas phase.

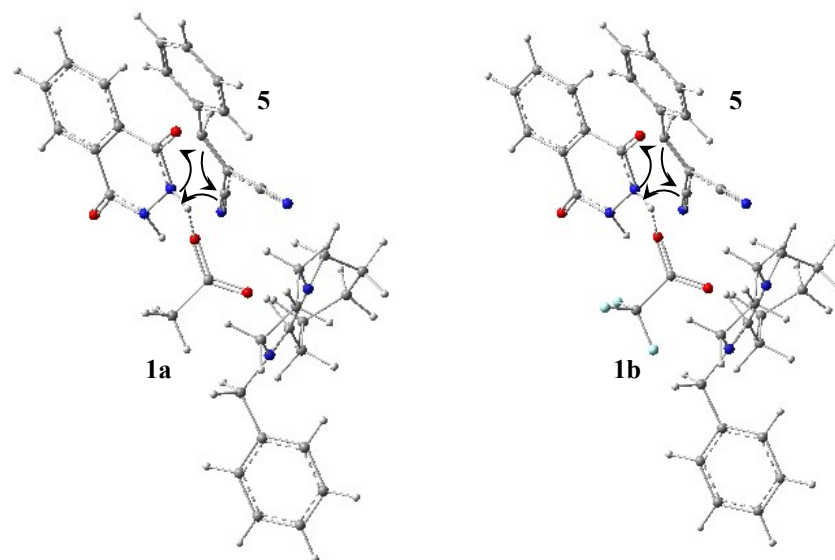

**Fig. S9** The approach of **5** to phthalhydrazide in its complexes with [Bn-DBU][AcO] and [Bn-DBU][TFA] ILs at B3LYP/SVP level of theory in gas phase.
